# Supplementary material for: Synergistic Antibacterial Mechanism of Mannosylerythritol Lipid-A and Lactic Acid on Listeria monocytogenes Based on Transcriptomic Analysis
Source: MDPI journal article supplement (doi:10.3390/foods11172660), 2022-09-01
Supplement: s1 [file s1]

### Supplementary file

**Figure S1** Bubble plot of GO enrichment analysis for ML group and control.

**Figure S2** KEGG histogram enrichment analysis of ML group and control.

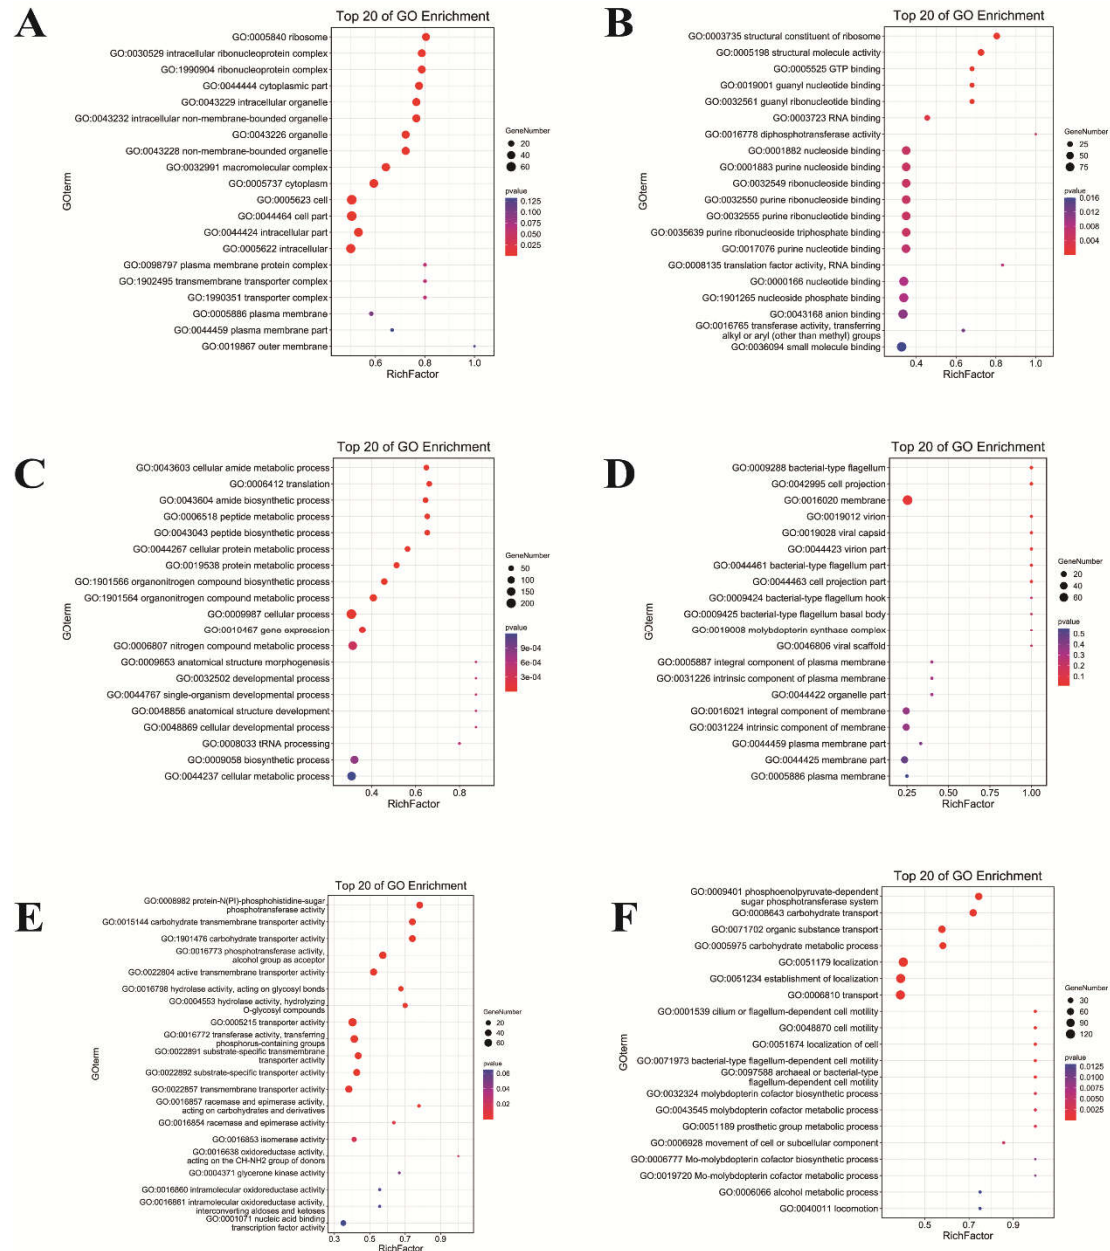

**Figure S1.** Bubble plot of GO enrichment analysis for ML group and control. Three main GO categories in up-regulated genes: (A) cellular component (CC), (B) molecular function (MF), (C) biological process (BP). Three main GO categories in down-regulated genes: (D) cellular component (CC), (E) molecular function (MF), (F) biological process (BP).

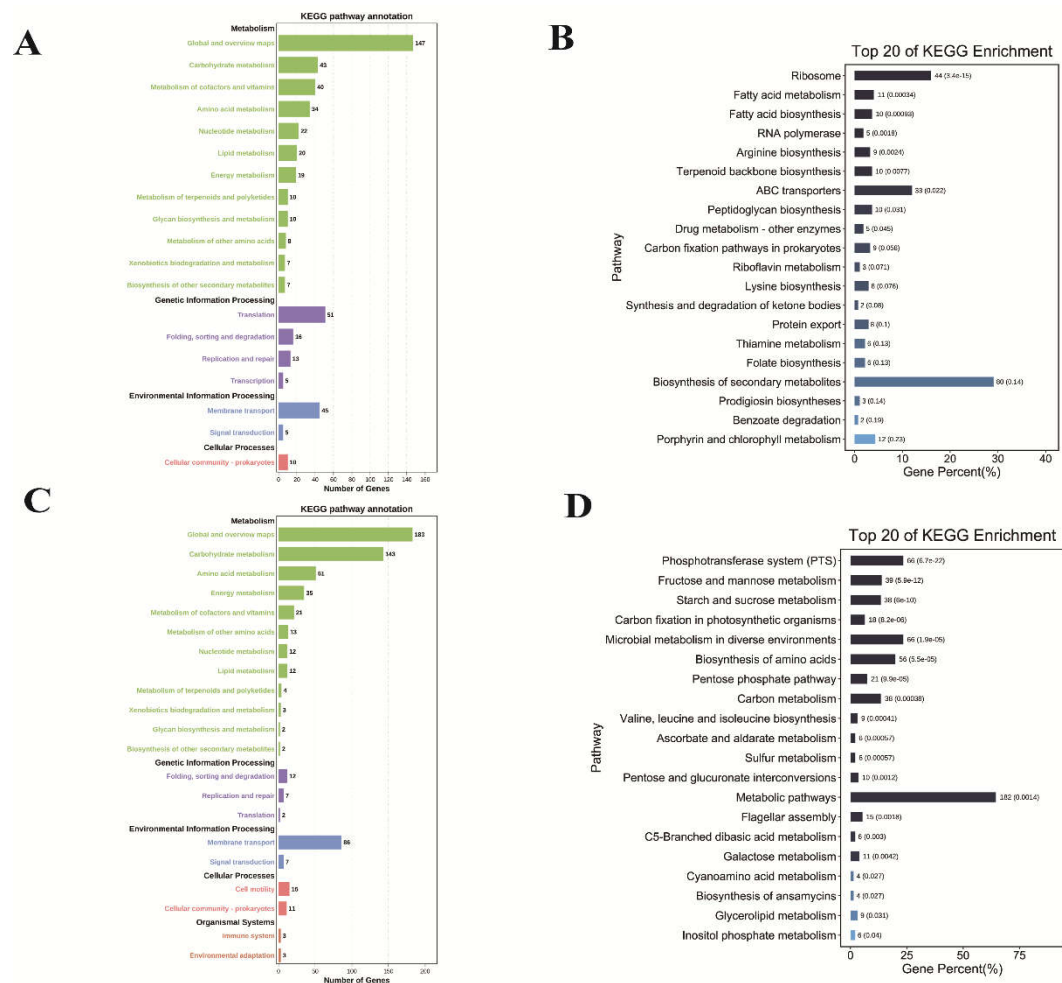

**Figure S2.** KEGG histogram enrichment analysis of ML group and control. Statistical plots of KEGG pathway B class classification in up-regulated (A) and down-regulated genes (C). Bar graphs of the top 20 significantly enriched pathways in up-regulated (B) and down-regulated genes (D).
